# Supplementary material for: Identification of Key Genes and Imbalanced SNAREs Assembly in the Comorbidity of Polycystic Ovary Syndrome and Depression
Source: MDPI journal article supplement (doi:10.3390/genes15040494), 2024-04-15
Supplement: s1 [file s1]

| key Genes |               |                |              |              |             |
|-----------|---------------|----------------|--------------|--------------|-------------|
|           | <i>SNAP23</i> | <i>PRKARIA</i> | <i>VTIIA</i> | <i>CASPI</i> | <i>IRS2</i> |
|           | rs2595939     | rs3744304      | rs10885349   | rs473549     | rs12584130  |
|           | rs575723419   | rs1112737      | rs12780297   | rs484626     | rs9583424   |
|           | rs36090286    | rs2909215      | rs7099263    | rs530537     | rs754205    |
|           | rs62019288    | rs888298       | rs11196033   | rs1977989    | rs754204    |
| SNPs      | rs112568544   | rs35967565     | rs4918773    | rs45483194   | rs4372569   |
|           | rs11630625    | rs11077579     | rs10787465   | rs76705537   | rs1967911   |
|           | rs33998900    | rs4458066      | rs6585192    |              | rs4771644   |
|           | rs117881887   | rs2885731      | rs11196120   |              | rs3742210   |
|           |               |                | rs10787470   |              |             |

Supplementary Table S2. SNPs screened in key genes. 8 SNPs at *SNAP23*, 8 SNPs at *PRKARIA*, 9 SNPs at *VTIIA*, 6 SNPs at *CASPI*, and 8 SNPs at *IRS2* were screened, respectively.
