# Supplementary material for: Identification of Key Genes and Imbalanced SNAREs Assembly in the Comorbidity of Polycystic Ovary Syndrome and Depression
Source: MDPI journal article supplement (doi:10.3390/genes15040494), 2024-04-15
Supplement: s1 [file s1]

| Cluster   | Hub gene | PCOS GSE6798 | Depression GSE76826 |
|-----------|----------|--------------|---------------------|
| Cluster 1 | SNAP23   | +            | +                   |
|           | BET1     |              |                     |
|           | VAMP5    |              | +                   |
|           | VTI1A    | +            | +                   |
| Cluster 2 | BAD      | +            |                     |
|           | BCL2L1   | +            |                     |
|           | IRS2     | +            | +                   |
|           | PRKAR1A  | +            | +                   |
|           | PRKCZ    |              | +                   |
|           | SYK      |              | +                   |
| Cluster 3 | AGPAT2   |              | +                   |
|           | AGPAT3   | +            |                     |
|           | AGPAT5   |              |                     |
| Cluster 4 | CASP1    | +            | +                   |
|           | NCF4     |              | +                   |
|           | PRKCA    | +            |                     |
|           | ADRB2    | +            |                     |

Supplementary Table S1. Verify the hub genes with other GSE datasets to identify the key genes. 10 hub genes were found positive in GSE6798 and also 10 hub genes in GSE76826 respectively. The overlapped hub genes in the two datasets were 5 genes including *CASP1*, *IRS2*, *PRKAR1A*, *SNAP23*, and *VTI1A*.
